# Supplementary material for: Dibenzyl ether-guided microstructural regulation of PtIrZn catalysts for ammonia electrocatalysis
Source: Royal Society of Chemistry journal article supplement (doi:10.1039/d5se00012b), 2025-01-01
Supplement: d5se00012b1.pdf [file d5se00012b1.pdf]

## Supporting Information

### Dibenzyl Ether-Guided Microstructural Regulation of PtIrZn Catalysts for Ammonia Electrocatalysis

Zilan Jiang<sup>a,b,d</sup>, Sibin zhu<sup>a,d</sup>, Xufeng Tang<sup>a,b,d</sup>, Haibo Tang<sup>b</sup>, Xiaoming Zhu<sup>c</sup>, Lun Yu<sup>a,d</sup>,  
Letian Li<sup>a,d</sup>, Yadong Wang<sup>\*,a,b,d</sup>, Haolin Tang<sup>\*,a,b,d</sup>, and Xiaoling Liu<sup>\*,c</sup>

a. State Key Laboratory of Advanced Technology for Materials Synthesis and Processing, Wuhan University of Technology, Wuhan 430070, China

b. National Energy Key Laboratory for New Hydrogen-Ammonia Energy Technologies, Foshan Xianhu Laboratory, No. 1 Yangming Road, Danzao Town, Nanhai District, Foshan 528200, China

c. Hubei Key Laboratory of Radiation Chemistry and Functional Materials and School of Nuclear Technology and Chemistry & Biology, Hubei University of Science and Technology, Xianning 437100, China

d. Hubei Key Laboratory of Fuel Cell, Wuhan University of Technology, Wuhan 430070, China

**\*Corresponding author**

E-mail: ywang@whut.edu.cn, thln@whut.edu.cn, xiaolingliu@hbust.edu.cn.

## Computational section:

First-principles calculations were performed within the density functional theory (DFT) framework, as implemented in the Vienna ab initio Simulation Package (VASP).<sup>1,2</sup> The core electrons were represented by the projector-augmented-wave (PAW) potential.<sup>3,4</sup> Generalized-gradient approximation (GGA) was used to determine the exchange-correlation potential.<sup>5</sup>

A 4×4 Pt supercell model with four layers was constructed, using the (100) or (111) surface as the interface. A 15 Å vacuum layer was introduced along the Z-axis to minimize interlayer interactions. Atoms in the bottom layer were fixed to simulate the bulk crystal structure. The plane wave cutoff energy of 400 eV and  $\Gamma$ -centered k-meshes with k-spacing of 0.3 Å<sup>-1</sup> were used for geometry optimization and static self-consistency (SCF). A 6×6×1 Monkhorst-Pack k-meshe was employed to sample the Brillouin zone for differential charge density and density of states (DOS). Electronic convergence and the geometry optimization force criterion were set to 10<sup>-5</sup> eV and 0.01 eV Å<sup>-1</sup>, respectively. All atoms, except those in the bottom layer, were fully relaxed until the total force on each atom converged to 0.03 eV Å<sup>-1</sup>.

As a result, the reaction free energy ( $\Delta G$ ) was further calculated by the equation:

$$\Delta G = \Delta E_{\text{DFT}} + \Delta \text{ZPE} - T\Delta S + eU + 0.059 \times \lg(\text{pH}) \quad (\text{S1})$$

where  $\Delta E_{\text{DFT}}$  represents the reaction energy obtained from DFT calculation;  $\Delta \text{ZPE}$  is the phonone zero-point energy;  $T\Delta S$  is the change in the harmonic entropy contribution to the free energy and is obtained by calculating the partition function using vibrational frequencies;  $U$  is the applied potential ( $U = 0$  or 0.3 V); and  $e$  is the charge transfer in each elementary step. Additionally, the thermodynamic corrections

for all adsorbed and free species considered in this study were referenced from citation.<sup>6</sup>

The visualization for all calculations was handled with the VESTA software.<sup>7</sup>

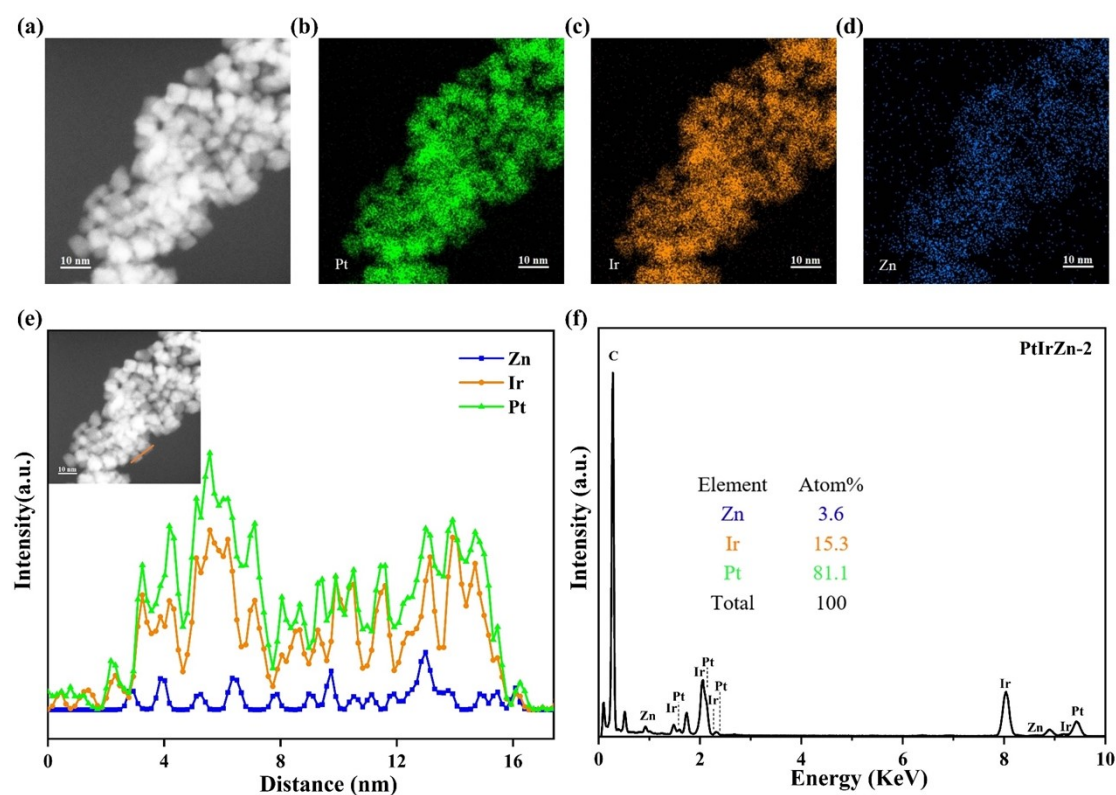

**Fig. S1** (a) HAADF-TEM image of PtIrZn-2; (b)-(d) elemental mapping images illustrating the distribution of Pt, Ir, and Zn; (e) line-scanning profiles recorded across the orange line indicated in the inset; and (f) HAADF-TEM-EDX spectrum of PtIrZn-2.

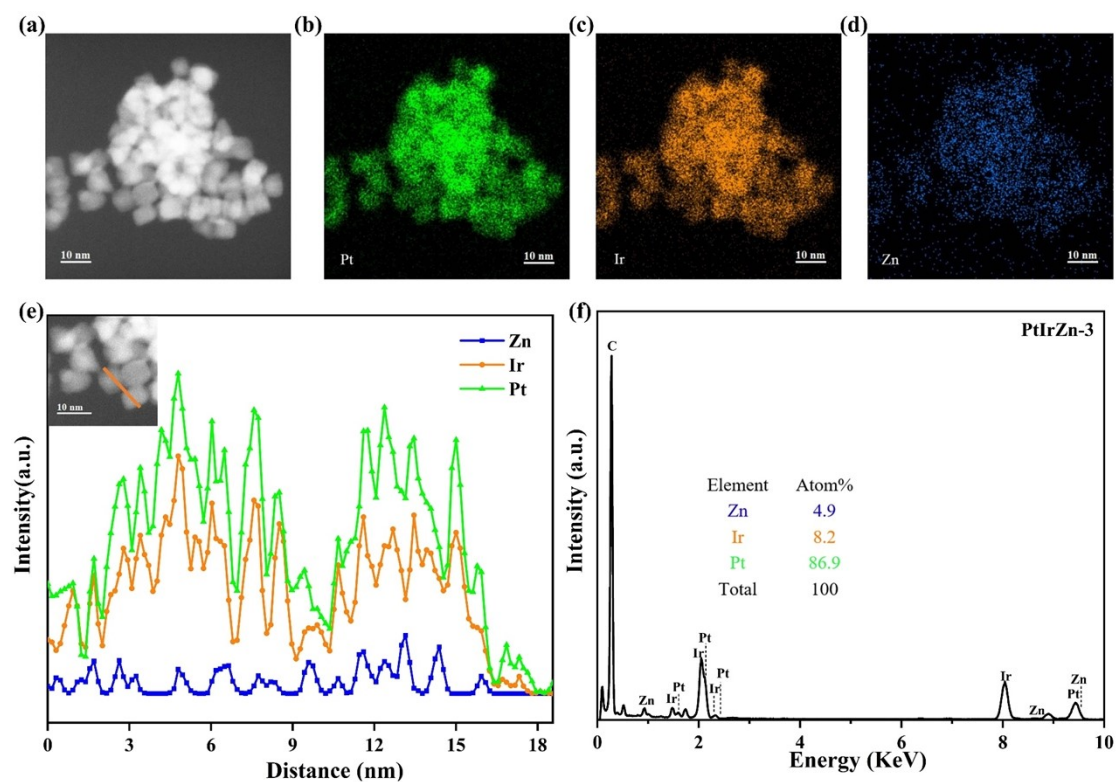

**Fig. S2** (a) HAADF-TEM image of PtIrZn-3; (b)-(d) elemental mapping images illustrating the distribution of Pt, Ir, and Zn; (e) line-scanning profiles recorded across the orange line indicated in the inset; and (f) HAADF-TEM-EDX spectrum of PtIrZn-3.

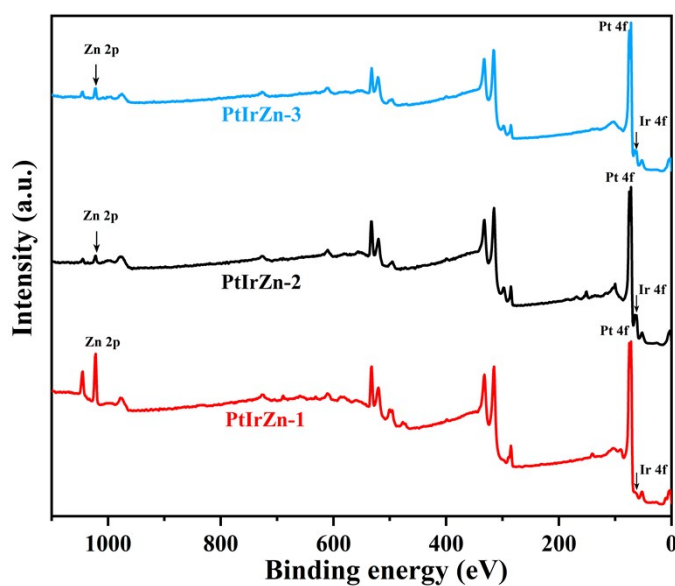

**Fig. S3** XPS full-scan survey spectra of PtIrZn-1, PtIrZn-2, and PtIrZn-3.

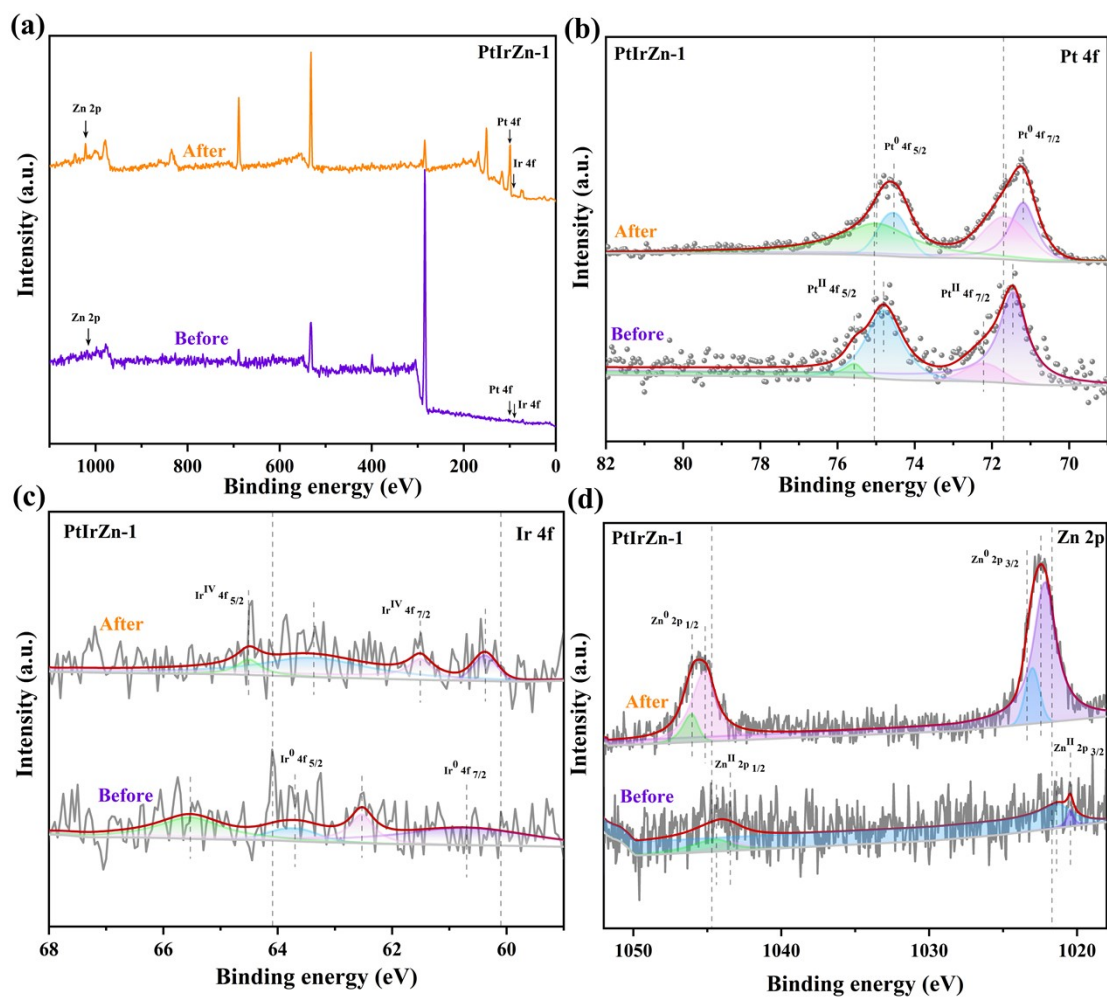

**Fig. S4** (a) XPS full-scan survey spectra and high-resolution XPS spectra of Pt 4f (b), Ir 4f (c), and Zn 2p (d) for the PtIrZn-1 catalyst film before and after activation.

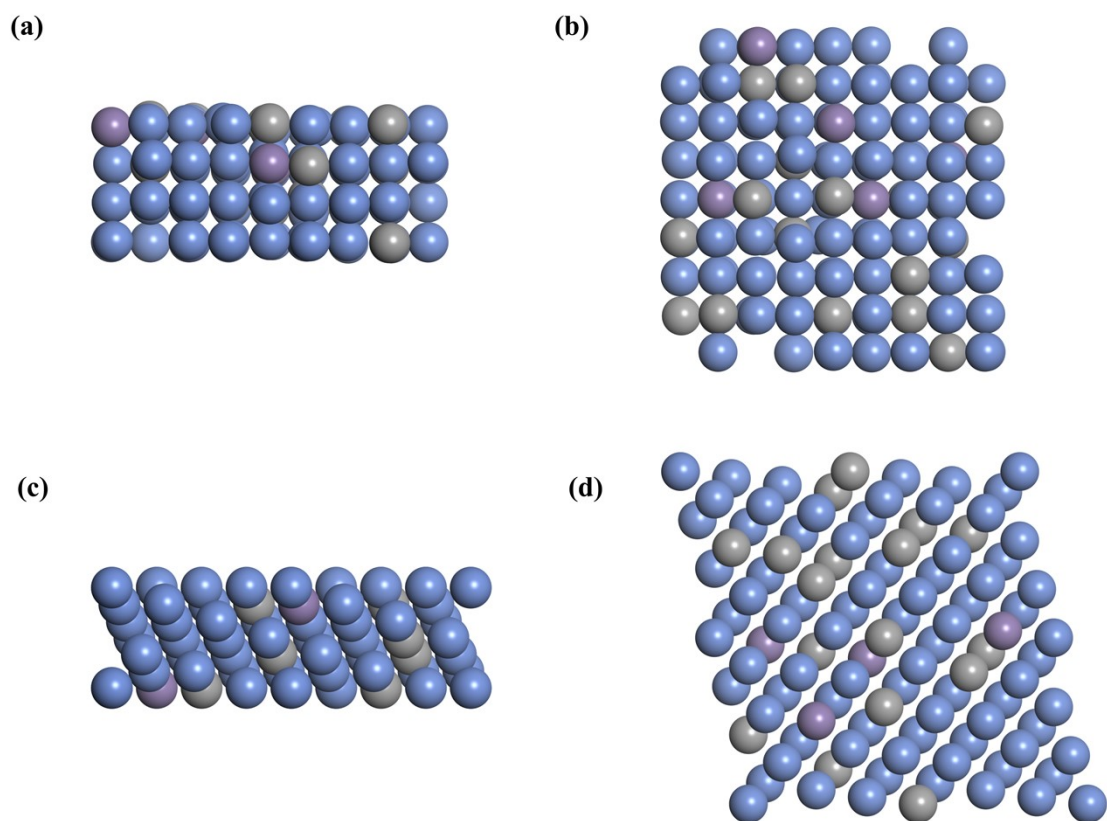

**Fig. S5** DFT computational models: side view (a) and top view (b) of PtIrZn-1(100), and side view (c) and top view (d) of PtIrZn-1(111).

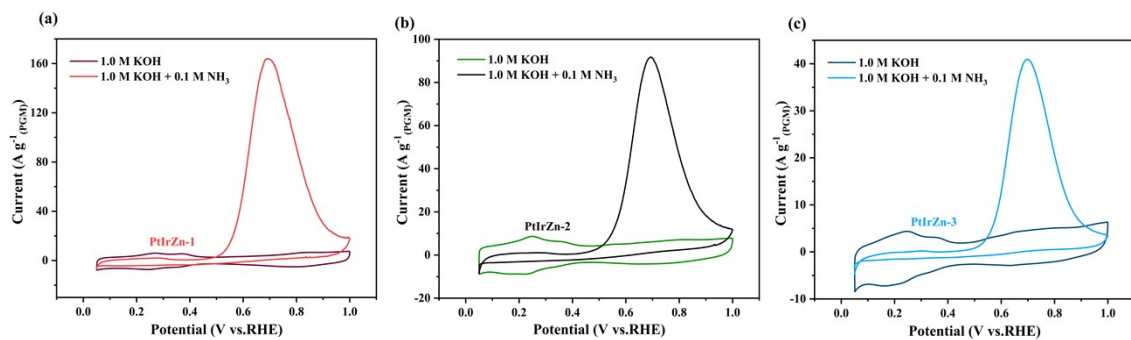

**Fig. S6** CVs of PtIrZn-1 (a), PtIrZn-2 (b), and PtIrZn-3 (c) in 1 M KOH and 1 M KOH + 0.1 M  $\text{NH}_3$ .

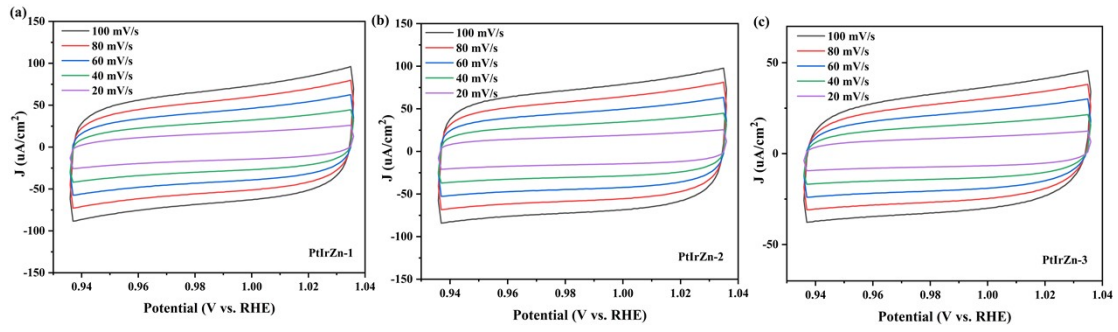

**Fig. S7** CVs of PtIrZn-1 (a), PtIrZn-2 (b), and PtIrZn-3 (c) measured in 1 M KOH over the potential range of 0.94 to 1.04 V vs. RHE at various scan rates from 20 to 100 mV s<sup>-1</sup>.

**Table S1.** Calculations Based on the Scherrer Equation.

| Gauss                      | Crystal | 2 $\Theta$ | B       | D          | D              | A       | V                  | $\Delta V$  |
|----------------------------|---------|------------|---------|------------|----------------|---------|--------------------|-------------|
|                            | Face    |            | (rad)   | (nm)       | (nm)           | (nm)    | (nm <sup>3</sup> ) | (%)         |
| <b>PtIrZn-1</b>            | (111)   | 40.1364    | 0.02669 | <b>5.5</b> | <b>0.22448</b> | 0.38880 | 0.05877            | <b>2.66</b> |
| (number of iterations: 27) | (200)   | 46.6425    | 0.02746 | <b>5.4</b> | <b>0.19457</b> | -       | -                  | -           |
|                            | (220)   | 68.1646    | 0.02623 | <b>6.3</b> | <b>0.13746</b> | -       | -                  | -           |
| <b>PtIrZn-2</b>            | (111)   | 39.9752    | 0.03197 | <b>4.6</b> | <b>0.22535</b> | 0.39030 | 0.05946            | <b>1.53</b> |
| (number of iterations: 20) | (200)   | 46.4454    | 0.03694 | <b>4.0</b> | <b>0.19535</b> | -       | -                  | -           |
|                            | (220)   | 67.8569    | 0.03808 | <b>4.3</b> | <b>0.13800</b> | -       | -                  | -           |
| <b>PtIrZn-3</b>            | (111)   | 39.8944    | 0.02718 | <b>5.4</b> | <b>0.22579</b> | 0.39106 | 0.05981            | <b>0.95</b> |
| (number of iterations: 17) | (200)   | 46.4776    | 0.03556 | <b>4.2</b> | <b>0.19522</b> | -       | -                  | -           |
|                            | (220)   | 67.8339    | 0.02976 | <b>5.6</b> | <b>0.13805</b> | -       | -                  | -           |

**Note:** K = 0.89,  $\lambda$  = 0.154056 nm,  $V_0$  = 0.0604 nm<sup>3</sup>;

**Table S2.** EIS Resistance Data.

| Catalyst        | $R_s$ ( $\Omega$ ) | $R_{ct}$ ( $\Omega$ ) |
|-----------------|--------------------|-----------------------|
| PtIrZn-1        | 6.405              | 518.9                 |
| PtIrZn-2        | 5.358              | 1218                  |
| PtIrZn-3        | 4.570              | 3070                  |
| commercial Pt/C | 5.944              | 865                   |
| PtIr            | 8.923              | 8860                  |
| PtZn            | 4.503              | 5242                  |

**Reference:**

- 1 G. Kresse and J. Furthmüller, *Computational Materials Science*, 1996, **6**, 15–50.
- 2 G. Kresse and J. Furthmüller, *Phys. Rev. B*, 1996, **54**, 11169–11186.
- 3 L. Lehtovaara, in *Fundamentals of Time-Dependent Density Functional Theory*, eds. M. A. L. Marques, N. T. Maitra, F. M. S. Nogueira, E. K. U. Gross and A. Rubio, Springer Berlin Heidelberg, Berlin, Heidelberg, 2012, vol. 837, pp. 391–400.
- 4 G. Kresse and D. Joubert, *Phys. Rev. B*, 1999, **59**, 1758–1775.
- 5 J. P. Perdew, K. Burke and M. Ernzerhof, *Phys. Rev. Lett.*, 1996, **77**, 3865–3868.
- 6 H. Zhang, L. Zhu, Y. Shen, M. Wu, T. Tian and H. Tang, *Adv Compos Hybrid Mater*, 2024, **7**, 46.
- 7 K. Momma and F. Izumi, *J Appl Crystallogr*, 2008, **41**, 653–658.
